# Supplementary material for: Effect of Point Mutations on Structural and Allergenic Properties of the Lentil Allergen Len c 3
Source: MDPI journal article supplement (doi:10.3390/membranes11120939), 2021-11-27
Supplement: s1 [file s1]

# Effect of Point Mutations on Structural and Allergenic Properties of the Lentil Allergen Len c 3

Daria N. Melnikova <sup>1,2,\*</sup>, Ekaterina I. Finkina <sup>1</sup>, Ivan V. Bogdanov <sup>1</sup>, Anastasia A. Ignatova <sup>1</sup>, Natalia S. Matveevskaya <sup>3</sup>, Andrey A. Tagaev <sup>1</sup> and Tatiana V. Ovchinnikova <sup>1,2</sup>

- <sup>1</sup> M.M. Shemyakin & Yu.A. Ovchinnikov Institute of Bioorganic Chemistry, The Russian Academy of Sciences, Miklukho-Maklaya Str., 16/10, 117997 Moscow, Russia; finkina@mail.ru (E.I.F.); contraton@mail.ru (I.V.B.); aignatova\_83@mail.ru (A.A.I.); andazitag@yandex.ru (A.A.T.); ovch@ibch.ru (T.V.O.)
- <sup>2</sup> Phystech School of Biological and Medical Physics, Moscow Institute of Physics and Technology (State University), 141701 Dolgoprudny, Russia
- <sup>3</sup> G.N. Gabrichevsky Research Institute for Epidemiology and Microbiology, Admiral Makarov St., 10, 125212 Moscow, Russia; matveevskaya@mail.ru
- \* Correspondence: d\_n\_m@mail.ru; Tel.: +7-495-335-42-00

**Table S1.** List of mutagenizing primers.

| Mutation | Mutagenizing primer sequences (5'-3')        |
|----------|----------------------------------------------|
| sT41A    | ACGCCTGATCGTCAGGCTGCCTG                      |
| ansT41A  | GCAGCCTGACGATCAGGCGTTGCGTTGGCGGCAGCAAGAAGC T |
| sY80A    | AAGATCAGTACCACCACCAACTG                      |
| ansY80A  | TTGGTGGTGGTACTGATCTTTGCAGGAATGTTGACACCACATT  |

**Table S2.** Secondary structure evaluation (%) predicted from Far-UV CD spectra.

| Sample     | $\alpha$ -helix, % | $\beta$ -sheet, % | $\beta$ -turn, % | random, % | NRMSD* |
|------------|--------------------|-------------------|------------------|-----------|--------|
| Len c 3    | 28.4               | 19.1              | 22.1             | 30.3      | 0.01   |
| T41A       | 29.3               | 18.1              | 22.3             | 30.1      | 0.02   |
| R45A       | 29.2               | 18.6              | 21.8             | 30.5      | 0.01   |
| Y80A       | 29.1               | 19.1              | 21.5             | 30.3      | 0.02   |
| T41A/ Y80A | 29.2               | 18.4              | 22.2             | 30.2      | 0.02   |
| R45A/ Y80A | 29.0               | 18.2              | 21.1             | 31.7      | 0.01   |

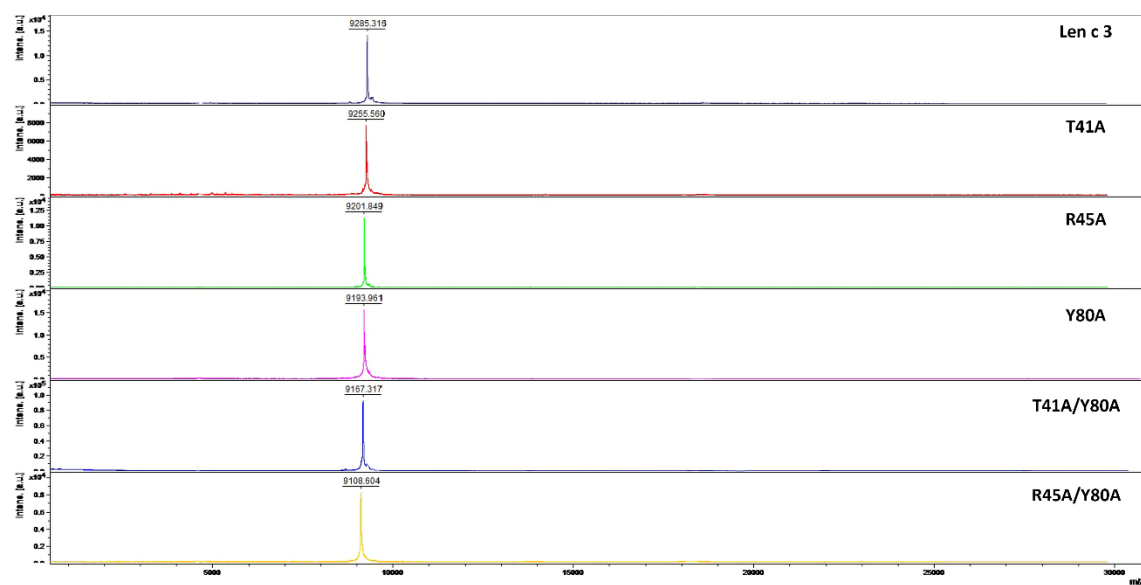

**Figure S1.** MALDI mass spectra of the Len c 3 and its mutant analogues.
